# Supplementary material for: Proposed Standard Test Protocols and Outcome Measures for Quantitative Comparison of Emissions from Electronic Nicotine Delivery Systems
Source: MDPI journal article supplement (doi:10.3390/ijerph19042144), 2022-02-14
Supplement: s1 [file s1]

**Supplemental Slides to accompany the article:**  
**Proposed Standard Test Protocols and Outcome Measures for Quantitative Comparison of Emissions from Electronic Nicotine Delivery Systems. DOI...**

Edward C. Hensel, Nathan C. Eddingsaas, Qutaiba M. Saleh, Shehan Jayasekera, S. Emma Sarles, A. Gary DiFrancesco, and Risa J. Robinson

**Funding:** Research reported in this publication was supported by the National Institute Of Environmental Health Sciences (NIEHS) of the National Institutes of Health and FDA Center for Tobacco Products (CTP) under Award Number R21ES029984. The content is solely the responsibility of the authors and does not necessarily represent the official views of the NIH or the Food and Drug Administration.

**Conflicts of Interest:** None of the authors have any conflicts of interest to declare.

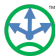

## Study Objectives:

- 1 Demonstrate an accurate, unbiased Emissions Model (EM) for quantifying aerosol emissions generated from pen- and pod-style ENDS across their respective operating envelope.
- 2 Identify characteristics of the EM which may be used to compare relative emissions between products.
- 3 Investigate associations between the EM characteristics and underlying product characteristics.
- 4 Propose characteristics likely to be effective regulatory parameters to achieve positive outcomes related to public health, reduction in harm potential and clinical guidance.



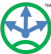

# Tobacco Product Design Characteristics

Thirteen ENDS and ELIQUID combinations were studied.

| Product ID Code | Device Manufacturer | Device Model  | Consumable Manufacturer | Consumable Labeled Flavor | Unpuffed E-Liquid $f_{Nic}$ | PG Fraction [-] | Mean $R_{Coil}$ [ $\Omega$ ] | Max (1) $P_{Nom}$ [W] | MaxAF [mL/s] | MaxAD [s] |
|-----------------|---------------------|---------------|-------------------------|---------------------------|-----------------------------|-----------------|------------------------------|-----------------------|--------------|-----------|
| EC07-02         | JUUL LABS           | Juul          | JUUL LABS               | Virginia Tobacco          | 0.052                       | 0.33            | 1.633                        | 6.7                   | 85           | 6.5       |
| EC10-01         | VUSE                | Alto          | VUSE                    | Original                  | 0.052                       | N/R             | 1.063                        | 10.2                  | 50           | 5         |
| EC12-01         | SMOK                | Novo 2        | MAD HATTER JUICE        | Classic Tobacco           | 0.039                       | 0.44            | 1.463                        | 7.4                   | 58           | 8         |
| EC14-01         | BLU                 | myblu         | BLU                     | Classic Tobacco           | 0.02                        | 0.42            | 1.416                        | 7.7                   | 88           | 10        |
| EC15-01         | NJOY                | Ace           | NJOY                    | Classic Tobacco           | 0.05                        | 0.48            | 1.034                        | 10.5                  | 58           | 5.5       |
| EC16-01         | UWELL               | Caliburn      | MAD HATTER JUICE        | Classic Tobacco           | 0.039                       | 0.44            | 1.405                        | 7.8                   | 88           | 10        |
| EC17-01         | ASPIRE              | Breeze 2      | MAD HATTER JUICE        | Classic Tobacco           | 0.039                       | 0.44            | 0.631                        | 17.3                  | 30           | 10.5      |
| EC18-01         | VAPOR4LIFE          | V4L Titan     | VAPOR4LIFE              | Wowbacco                  | 0.023                       | 0.73            | 2.258                        | 4.8                   | 50           | 10        |
| EC19-01         | LOGIC VAPES         | Logic Pro     | LOGIC VAPES             | Tobacco                   | 0.016                       | 0.77            | 2.443                        | 4.5                   | 48           | 12        |
| EC20-01         | LOONTECH            | Hyde Original | LOONTECH                | Spearmint                 | 0.061                       | N/R             | 1.61                         | 6.8                   | 86           | 10        |
| EC22-01         | VUSE                | Vibe          | VUSE                    | Original Tobacco          | 0.03                        | 0.23            | 2.693                        | 4.0                   | 68           | 6         |
| EC23-01         | SMOK                | Stick Prince  | MAD HATTER JUICE        | Classic Tobacco           | 0.052                       | 0.44            | 0.174                        | 62.6                  | 90           | 8         |
| EC24-01         | PUFF BAR            | Puff Bar      | PUFF BAR                | Tobacco                   | 0.049                       | 0.54            | 1.688                        | 6.5                   | 50           | 3.6       |

Notes: (1) Power was not experimentally measured in this investigation. Maximum nominal power was, for relative comparison only, computed from

$P_{Nom} = V_{Nom}^2 / R_{Coil}$  where  $V_{Nom}$  was set to a constant value of 3.3 [VDC].

**Results:** A graphical summary of the screening emissions model for each ENDS PCU, RESERVOIR, and Consumable.

# Emissions Model: EC17-01 ASPIRE Breeze 2 with MAD HATTER JUICE Classic Tobacco

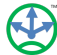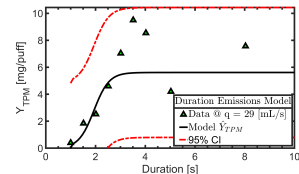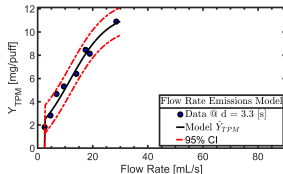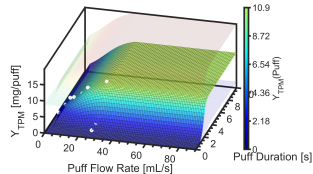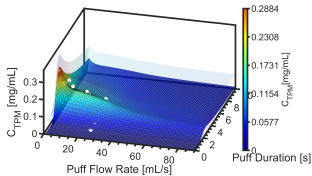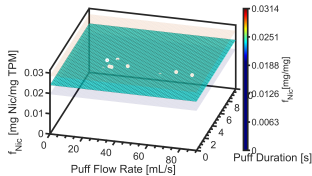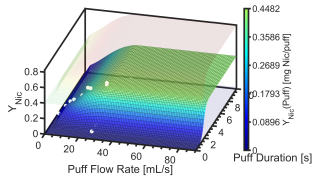

$$\hat{Y}_{TPM}(Puff) = \frac{1}{\min(B_1, B_4)} \left( \frac{B_1}{1 + \exp(B_2[q - B_3])} \cdot \frac{B_4}{1 + \exp(B_5[d - B_6])} \right); \quad \hat{C}_{TPM} = \frac{\hat{Y}_{TPM}(Puff)}{q \cdot d}; \quad \hat{Y}_{Nic}(Puff) = f_{Nic}(q, d) \hat{Y}_{TPM}(Puff)$$

MinAD = 1.00 s      MinAF = 2.5 mL/s  
MaxAD = 10.5 s      MaxAF = 30. mL/s

$B_1 = 11.698$        $B_4 = 5.613$   
 $B_2 = 0.144$        $B_5 = 3.301$   
 $B_3 = 11.745$        $B_6 = 1.940$

$f_{Nic} = 0.039 \pm 0.019 \text{ mg/mg}$

Max  $Y_{TPM}(puff) = 10.9 \pm 8.97 \text{ mg/puff}$   
Max  $Y_{Nic}(puff) = 0.425 \pm 0.406 \text{ mg/puff}$   
Max  $C_{TPM} = 0.300 \pm 0.072 \text{ mg/mL}$

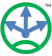

# Emissions Model: EC14-01 BLU myBlu with BLU Classic Tobacco

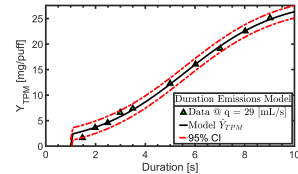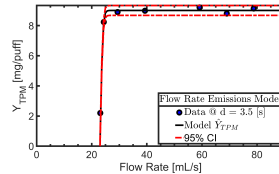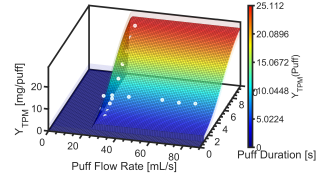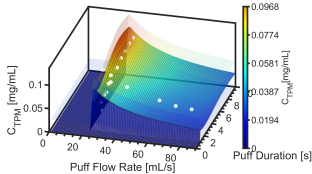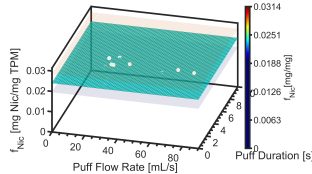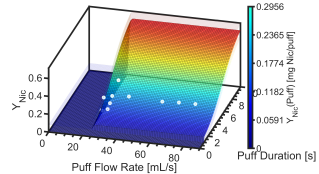

$$\hat{Y}_{TPM}(Puff) = \frac{1}{\min(B_1, B_4)} \left( \frac{B_1}{1 + \exp(B_2[q - B_3])} \cdot \frac{B_4}{1 + \exp(B_5[d - B_6])} \right); \quad \hat{C}_{TPM} = \frac{\hat{Y}_{TPM}(Puff)}{q \cdot d}; \quad \hat{Y}_{Nic}(Puff) = f_{Nic}(q, d) \hat{Y}_{TPM}(Puff)$$

MinAD = 1.00 s    MinAF = 23. mL/s  
MaxAD = 10.0 s    MaxAF = 88. mL/s

$B_1 = 9.005$      $B_4 = 28.9$   
 $B_2 = 2.751$      $B_5 = 0.531$   
 $B_3 = 23.52$      $B_6 = 5.604$

$f_{Nic} = 0.024 \pm 0.005 \text{ mg/mg}$

Max  $Y_{TPM}(puff) = 23.3 \pm 2.71 \text{ mg/puff}$   
Max  $Y_{Nic}(puff) = 0.634 \pm 0.081 \text{ mg/puff}$   
Max  $C_{TPM} = 0.110 \pm 0.023 \text{ mg/mL}$



# Emissions Model: EC7-02 JUUL LABS Juul with JUUL LABS Virginia Tobacco

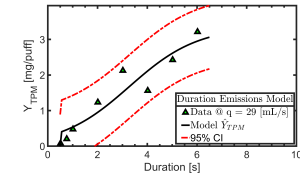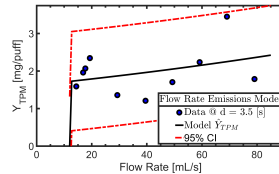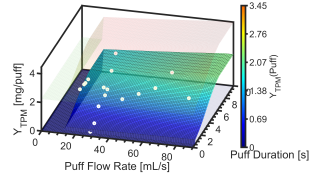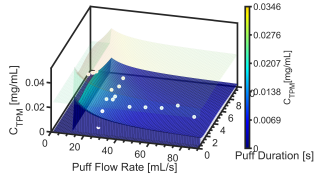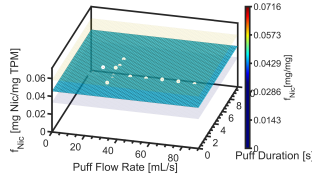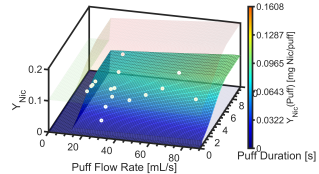

$$\hat{Y}_{TPM}(Puff) = \frac{1}{\min(B_1, B_4)} \left( \frac{B_1}{1 + \exp(B_2[q - B_3])} \cdot \frac{B_4}{1 + \exp(B_5[d - B_6])} \right); \quad \hat{C}_{TPM} = \frac{\hat{Y}_{TPM}(Puff)}{q \cdot d}; \quad \hat{Y}_{Nic}(Puff) = f_{Nic}(q, d) \hat{Y}_{TPM}(Puff)$$

|               |                  |                |               |                                           |                                                       |
|---------------|------------------|----------------|---------------|-------------------------------------------|-------------------------------------------------------|
| MinAD = 0.5 s | MinAF = 12. mL/s | $B_1 = 84.69$  | $B_4 = 3.359$ | $f_{Nic} = 0.046 \pm 0.012 \text{ mg/mg}$ | Max $Y_{TPM}(puff) = 2.210 \pm 2.25 \text{ mg/puff}$  |
| MaxAD = 6.5 s | MaxAF = 85. mL/s | $B_2 = 0.0048$ | $B_5 = 0.726$ |                                           | Max $Y_{Nic}(puff) = 0.101 \pm 0.104 \text{ mg/puff}$ |
|               |                  | $B_3 = 822.4$  | $B_6 = 3.288$ |                                           | Max $C_{TPM} = 0.028 \pm 0.024 \text{ mg/mL}$         |



# Emissions Model: EC19-01 LOGIC VAPES Logic Pro with LOGIC VAPES Tobacco

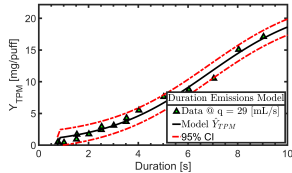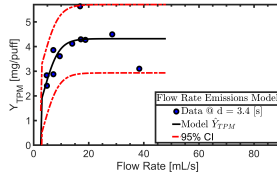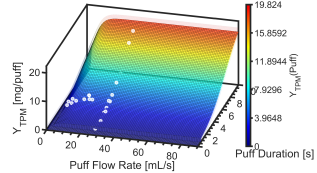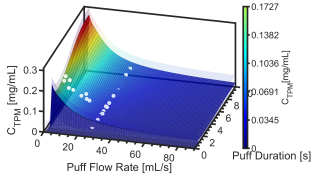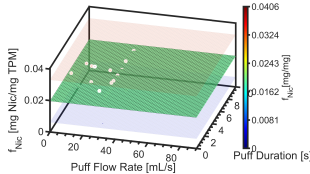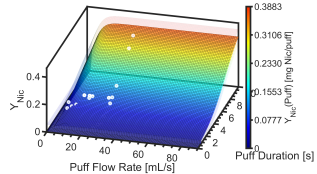

$$\hat{Y}_{TPM}(Puff) = \frac{1}{\min(B_1, B_4)} \left( \frac{B_1}{1 + \exp(B_2[q - B_3])} \cdot \frac{B_4}{1 + \exp(B_5[d - B_6])} \right); \quad \hat{C}_{TPM} = \frac{\hat{Y}_{TPM}(Puff)}{q \cdot d}; \quad \hat{Y}_{Nic}(Puff) = f_{Nic}(q, d) \hat{Y}_{TPM}(Puff)$$

|                |                  |               |                |                                           |                                                       |
|----------------|------------------|---------------|----------------|-------------------------------------------|-------------------------------------------------------|
| MinAD = 0.75 s | MinAF = 2.4 mL/s | $B_1 = 4.319$ | $B_4 = 22.614$ | $f_{Nic} = 0.013 \pm 0.412 \text{ mg/mg}$ | Max $Y_{TPM}(puff) = 20.9 \pm 1.45 \text{ mg/puff}$   |
| MaxAD = 12. s  | MaxAF = 48. mL/s | $B_2 = 0.361$ | $B_5 = 0.484$  |                                           | Max $Y_{Nic}(puff) = 0.412 \pm 0.054 \text{ mg/puff}$ |
|                |                  | $B_3 = 3.661$ | $B_6 = 6.818$  |                                           | Max $C_{TPM} = 0.276 \pm 0.036 \text{ mg/mL}$         |

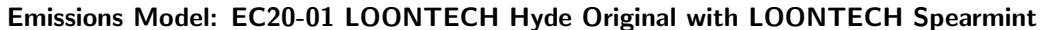

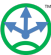

# Emissions Model: EC15-01 NJOY Ace with NJOY Classic Tobacco

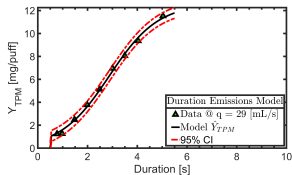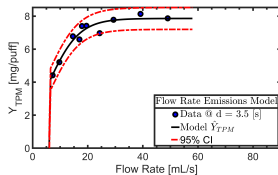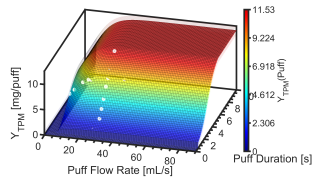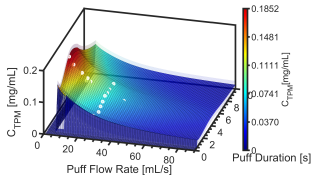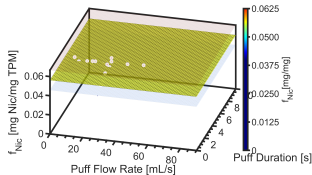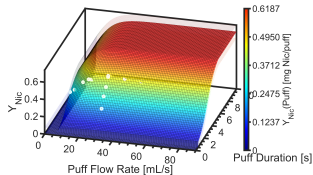

$$\hat{Y}_{TPM}(Puff) = \frac{1}{\min(B_1, B_4)} \left( \frac{B_1}{1 + \exp(B_2[q - B_3])} \cdot \frac{B_4}{1 + \exp(B_5[d - B_6])} \right); \quad \hat{C}_{TPM} = \frac{\hat{Y}_{TPM}(Puff)}{q \cdot d};$$

$$\hat{Y}_{Nic}(Puff) = f_{Nic}(q, d) \hat{Y}_{TPM}(Puff)$$

MinAD = 0.5 s

MinAF = 6. mL/s

$B_1 = 7.860$

$B_4 = 12.60$

$f_{Nic} = 0.056 \pm 0.019 \text{ mg/mg}$

Max  $Y_{TPM}(puff) = 11.79 \pm 8.97 \text{ mg/puff}$

MaxAD = 5.5 s

MaxAF = 58. mL/s

$B_2 = 0.181$

$B_5 = 1.020$

Max  $Y_{Nic}(puff) = 0.663 \pm 0.010 \text{ mg/puff}$

$B_3 = 5.814$

$B_6 = 2.876$

Max  $C_{TPM} = 0.190 \pm 0.012 \text{ mg/mL}$





# Emissions Model: EC24-01 PUFF BAR Puff Bar with PUFF BAR Tobacco

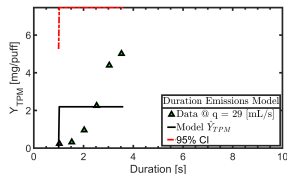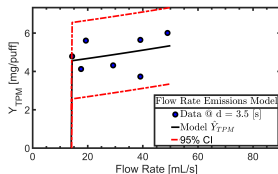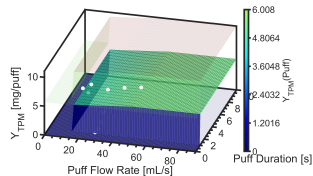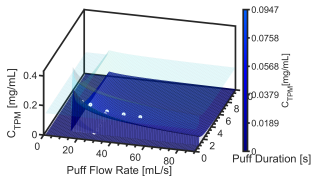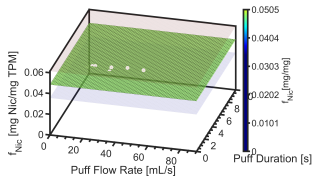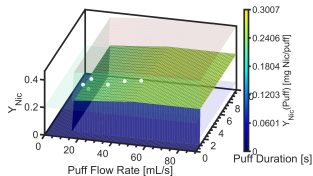

$$\hat{Y}_{TPM}(Puff) = \frac{1}{\min(B_1, B_4)} \left( \frac{B_1}{1 + \exp(B_2[q - B_3])} \cdot \frac{B_4}{1 + \exp(B_5[d - B_6])} \right); \quad \hat{C}_{TPM} = \frac{\hat{Y}_{TPM}(Puff)}{q \cdot d}; \quad \hat{Y}_{Nic}(Puff) = f_{Nic}(q, d) \hat{Y}_{TPM}(Puff)$$

MinAD = 1.0 s

MinAF = 14. mL/s

$B_1 = 230.1$

$B_4 = 2.198$

$f_{Nic} = 0.049 \pm 0.013 \text{ mg/mg}$

Max  $Y_{TPM}(puff) = 5.343 \pm 5.721 \text{ mg/puff}$

MaxAD = 3.6 s

MaxAF = 50. mL/s

$B_2 = 0.0045$

$B_5 = -5255.4$

Max  $Y_{Nic}(puff) = 0.260 \pm 0.204 \text{ mg/puff}$

$B_3 = 876.1$

$B_6 = 4.365$

Max  $C_{TPM} = 0.288 \pm 0.144 \text{ mg/mL}$

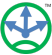

# Emissions Model: EC12-01 SMOK Novo 2 with MAD HATTER JUICE Classic Tobacco

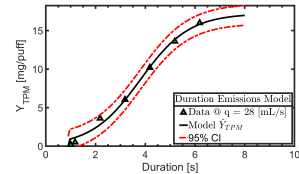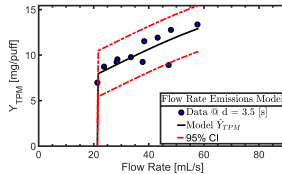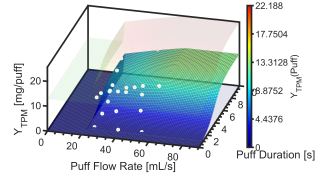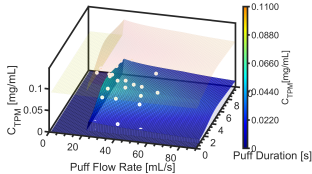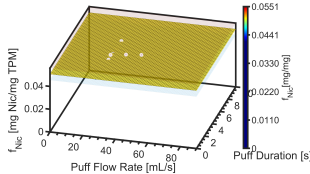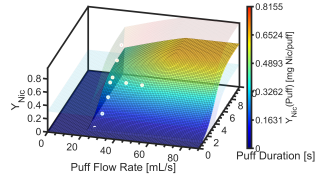

$$\hat{Y}_{TPM}(Puff) = \frac{1}{\min(B_1, B_4)} \left( \frac{B_1}{1 + \exp(B_2[q - B_3])} \cdot \frac{B_4}{1 + \exp(B_5[d - B_6])} \right); \quad \hat{C}_{TPM} = \frac{\hat{Y}_{TPM}(Puff)}{q \cdot d}; \quad \hat{Y}_{Nic}(Puff) = f_{Nic}(q, d) \hat{Y}_{TPM}(Puff)$$

MinAD = 0.9 s      MinAF = 21.3 mL/s  
MaxAD = 8.0 s      MaxAF = 58. mL/s

$B_1 = 17.113$        $B_4 = 17.206$   
 $B_2 = 0.0348$        $B_5 = 1.017$   
 $B_3 = 25.603$        $B_6 = 3.798$

$f_{Nic} = 0.051 \pm 0.005 \text{ mg/mg}$

Max  $Y_{TPM}(puff) = 12.8 \pm 12.9 \text{ mg/puff}$   
Max  $Y_{Nic}(puff) = 0.65 \pm 0.31 \text{ mg/puff}$   
Max  $C_{TPM} = 0.057 \pm 0.091 \text{ mg/mL}$



# Emissions Model: EC23-01 SMOK Stick Prince MAD HATTER JUICE Classic Tobacco

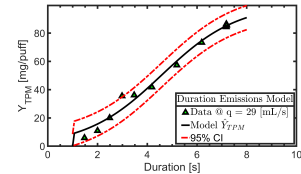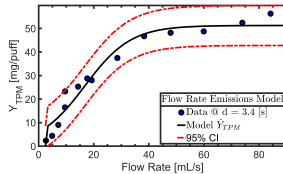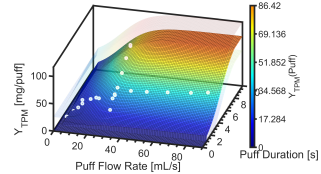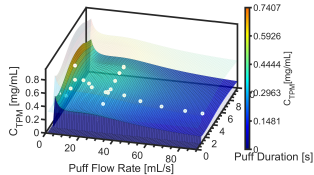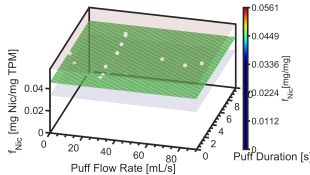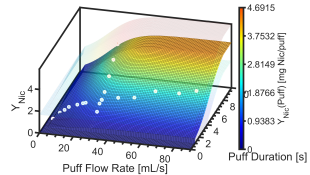

$$\hat{Y}_{TPM}(Puff) = \frac{1}{\min(B_1, B_4)} \left( \frac{B_1}{1 + \exp(B_2[q - B_3])} \cdot \frac{B_4}{1 + \exp(B_5[d - B_6])} \right); \quad \hat{C}_{TPM} = \frac{\hat{Y}_{TPM}(Puff)}{q \cdot d}; \quad \hat{Y}_{Nic}(Puff) = f_{Nic}(q, d) \hat{Y}_{TPM}(Puff)$$

MinAD = 2.5 s    MinAF = 2.5 mL/s     $B_1 = 51.253$      $B_4 = 100.66$      $f_{Nic} = 0.046 \pm 0.012 \text{ mg/mg}$   
 MaxAD = 8. s    MaxAF = 90. mL/s     $B_2 = 0.120$      $B_5 = 0.654$   
 $B_3 = 16.803$      $B_6 = 4.581$

Max  $Y_{TPM}(puff) = 90.94 \pm 25.94 \text{ mg/puff}$   
 Max  $Y_{Nic}(puff) = 4.175 \pm 1.688 \text{ mg/puff}$   
 Max  $C_{TPM} = 0.651 \pm 0.312 \text{ mg/mL}$



# Emissions Model: EC16-01 UWELL Caliburn MAD HATTER JUICE Classic Tobacco

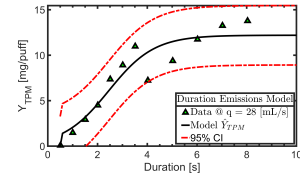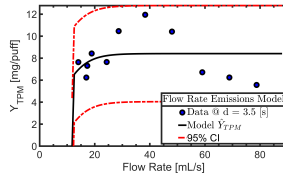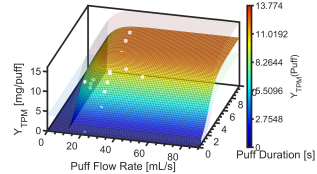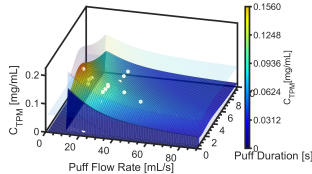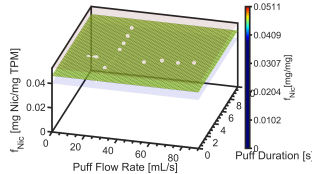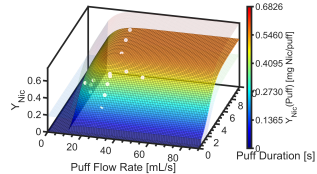

$$\hat{Y}_{TPM}(Puff) = \frac{1}{\min(B_1, B_4)} \left( \frac{B_1}{1 + \exp(B_2[q - B_3])} \cdot \frac{B_4}{1 + \exp(B_5[d - B_6])} \right); \quad \hat{C}_{TPM} = \frac{\hat{Y}_{TPM}(Puff)}{q \cdot d}; \quad \hat{Y}_{Nic}(Puff) = f_{Nic}(q, d) \hat{Y}_{TPM}(Puff)$$

MinAD = 0.5 s      MinAF = 11.8 mL/s  
MaxAD = 10. s      MaxAF = 88. mL/s

$B_1 = 8.416$        $B_4 = 12.196$   
 $B_2 = 0.215$        $B_5 = 1.093$   
 $B_3 = 6.813$        $B_6 = 2.454$

$f_{Nic} = 0.046 \pm 0.006 \text{ mg/mg}$

Max  $Y_{TPM}(puff) = 12.2 \pm 3.96 \text{ mg/puff}$   
Max  $Y_{Nic}(puff) = 0.565 \pm 0.186 \text{ mg/puff}$   
Max  $C_{TPM} = 0.167 \pm 0.059 \text{ mg/mL}$



# Emissions Model: EC18-01 VAPOR4LIFE Titan VAPOR4LIFE Wowbacco

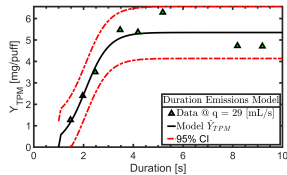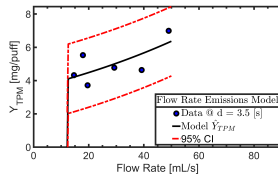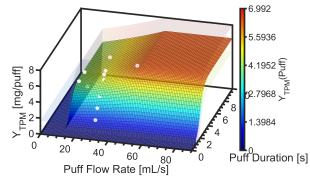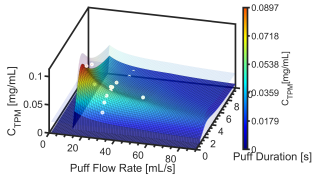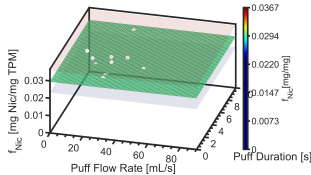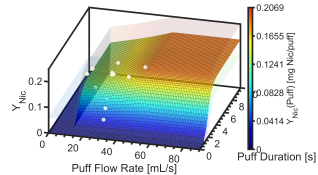

$$\hat{Y}_{TPM}(Puff) = \frac{1}{\min(B_1, B_4)} \left( \frac{B_1}{1 + \exp(B_2[q - B_3])} \cdot \frac{B_4}{1 + \exp(B_5[d - B_6])} \right); \quad \hat{C}_{TPM} = \frac{\hat{Y}_{TPM}(Puff)}{q \cdot d}; \quad \hat{Y}_{Nic}(Puff) = f_{Nic}(q, d) \hat{Y}_{TPM}(Puff)$$

MinAD = 1.00 s    MinAF = 12.2 mL/s  
MaxAD = 10. s    MaxAF = 50. mL/s

$B_1 = 349.59$      $B_4 = 5.350$   
 $B_2 = 0.012$      $B_5 = 2.125$   
 $B_3 = 386.3$      $B_6 = 2.081$

$f_{Nic} = 0.0296 \pm 0.030 \text{ mg/mg}$

Max  $Y_{TPM}(puff) = 6.365 \pm 1.664 \text{ mg/puff}$   
Max  $Y_{Nic}(puff) = 0.188 \pm 0.061 \text{ mg/puff}$   
Max  $C_{TPM} = 0.094 \pm 0.019 \text{ mg/mL}$



# Emissions Model: EC10-01 VUSE Alto VUSE Original

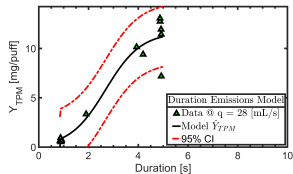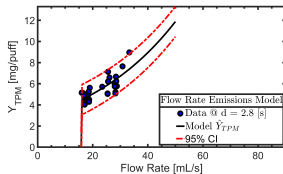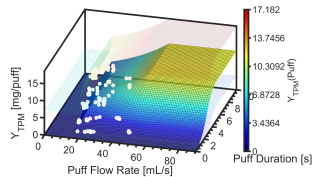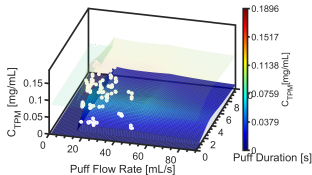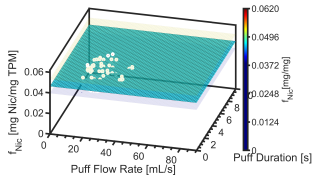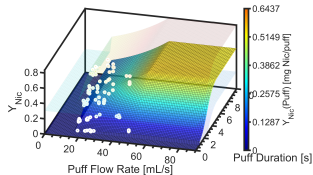

$$\hat{Y}_{TPM}(Puff) = \frac{1}{\min(B_1, B_4)} \left( \frac{B_1}{1 + \exp(B_2[q - B_3])} \cdot \frac{B_4}{1 + \exp(B_5[d - B_6])} \right); \quad \hat{C}_{TPM} = \frac{\hat{Y}_{TPM}(Puff)}{q \cdot d}; \quad \hat{Y}_{Nic}(Puff) = f_{Nic}(q, d) \hat{Y}_{TPM}(Puff)$$

MinAD = 0.85 s

MinAF = 15.8 mL/s

$B_1 = 298.59$

$B_4 = 11.636$

$f_{Nic} = 0.046 \pm 0.007 \text{ mg/mg}$

Max  $Y_{TPM}(puff) = 11.43 \pm 7.23 \text{ mg/puff}$

MaxAD = 5. s

MaxAF = 50. mL/s

$B_2 = 0.029$

$B_5 = 1.404$

Max  $Y_{Nic}(puff) = 0.531 \pm 0.305 \text{ mg/puff}$

$B_3 = 158.37$

$B_6 = 2.686$

Max  $C_{TPM} = 0.061 \pm 0.085 \text{ mg/mL}$



# Emissions Model: EC22-01 VUSE Vibe VUSE Original

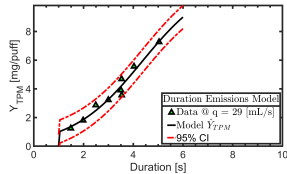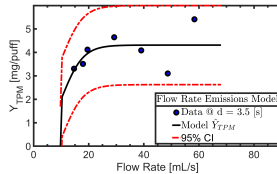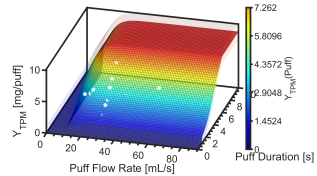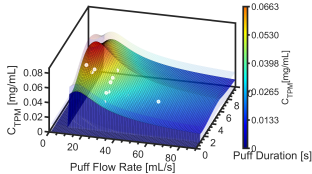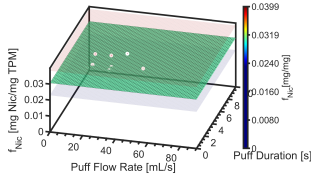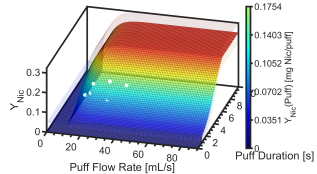

$$\hat{Y}_{TPM}(Puff) = \frac{1}{\min(B_1, B_4)} \left( \frac{B_1}{1 + \exp(B_2[q - B_3])} \cdot \frac{B_4}{1 + \exp(B_5[d - B_6])} \right); \quad \hat{C}_{TPM} = \frac{\hat{Y}_{TPM}(Puff)}{q \cdot d}; \quad \hat{Y}_{Nic}(Puff) = f_{Nic}(q, d) \hat{Y}_{TPM}(Puff)$$

|              |                   |                |                |                                           |                                                       |
|--------------|-------------------|----------------|----------------|-------------------------------------------|-------------------------------------------------------|
| MinAD = 1. s | MinAF = 9.75 mL/s | $B_1 = 4.310$  | $B_4 = 11.788$ | $f_{Nic} = 0.031 \pm 0.008 \text{ mg/mg}$ | Max $Y_{TPM}(puff) = 8.998 \pm 1.21 \text{ mg/puff}$  |
| MaxAD = 6. s | MaxAF = 68. mL/s  | $B_2 = 0.265$  | $B_5 = 0.711$  |                                           | Max $Y_{Nic}(puff) = 0.276 \pm 0.048 \text{ mg/puff}$ |
|              |                   | $B_3 = 10.538$ | $B_6 = 4.353$  |                                           | Max $C_{TPM} = 0.077 \pm 0.010 \text{ mg/mL}$         |

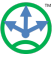

# Interval Plot: Tobacco Product Maximum Emissions Characteristics Comparison

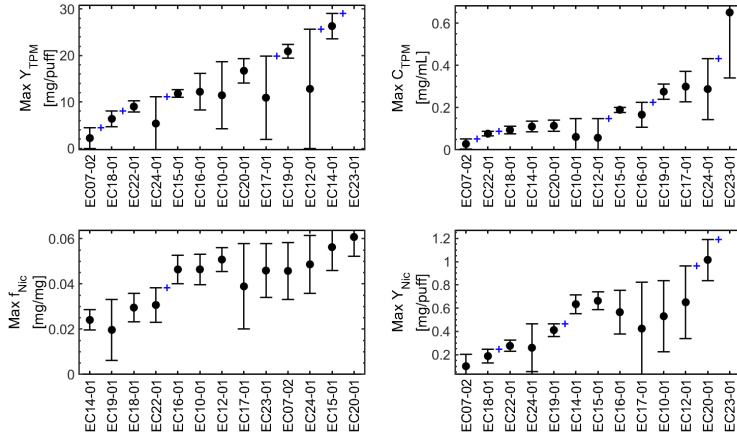





# Tobacco Product Emissions Characteristics

| Product ID Code | Device Manufacturer | Device Model  | Consumable Manufacturer | Consumable Labeled Flavor | Max $Y_{TPM}$ [mg/puff] | Max $C_{TPM}$ [mg/mL] | Max $f_{Nic}$ [mg/mg] | Max $Y_{Nic}$ [mg/puff] |
|-----------------|---------------------|---------------|-------------------------|---------------------------|-------------------------|-----------------------|-----------------------|-------------------------|
| EC07-02         | JUUL LABS           | Juul          | JUUL LABS               | Virginia Tobacco          | 2.210                   | 0.028                 | 0.046                 | 0.101                   |
| EC10-01         | VUSE                | Alto          | VUSE                    | Original                  | 11.433                  | 0.061                 | 0.046                 | 0.531                   |
| EC12-01         | SMOK                | Novo 2        | MAD HATTER JUICE        | Classic Tobacco           | 12.814                  | 0.057                 | 0.051                 | 0.650                   |
| EC14-01         | BLU                 | myblu         | BLU                     | Classic Tobacco           | 26.341                  | 0.110                 | 0.024                 | 0.634                   |
| EC15-01         | NJOY                | Ace           | NJOY                    | Classic Tobacco           | 11.790                  | 0.190                 | 0.056                 | 0.663                   |
| EC16-01         | UWELL               | Caliburn      | MAD HATTER JUICE        | Classic Tobacco           | 12.193                  | 0.167                 | 0.046                 | 0.565                   |
| EC17-01         | ASPIRE              | Breeze 2      | MAD HATTER JUICE        | Classic Tobacco           | 10.911                  | 0.300                 | 0.039                 | 0.424                   |
| EC18-01         | VAPOR4LIFE          | V4L Titan     | VAPOR4LIFE              | Wowbacco                  | 6.365                   | 0.094                 | 0.030                 | 0.188                   |
| EC19-01         | LOGIC VAPES         | Logic Pro     | LOGIC VAPES             | Tobacco                   | 20.911                  | 0.276                 | 0.020                 | 0.412                   |
| EC20-01         | LOONTECH            | Hyde Original | LOONTECH                | Spearmint                 | 16.714                  | 0.114                 | 0.061                 | 1.015                   |
| EC22-01         | VUSE                | Vibe          | VUSE                    | Original Tobacco          | 8.998                   | 0.077                 | 0.031                 | 0.276                   |
| EC23-01         | SMOK                | Stick Prince  | MAD HATTER JUICE        | Classic Tobacco           | 90.943                  | 0.651                 | 0.046                 | 4.175                   |
| EC24-01         | PUFF BAR            | Puff Bar      | PUFF BAR                | Tobacco                   | 5.343                   | 0.288                 | 0.049                 | 0.260                   |



# Maximal emissions screening dashboard for consumer-oriented product comparisons.

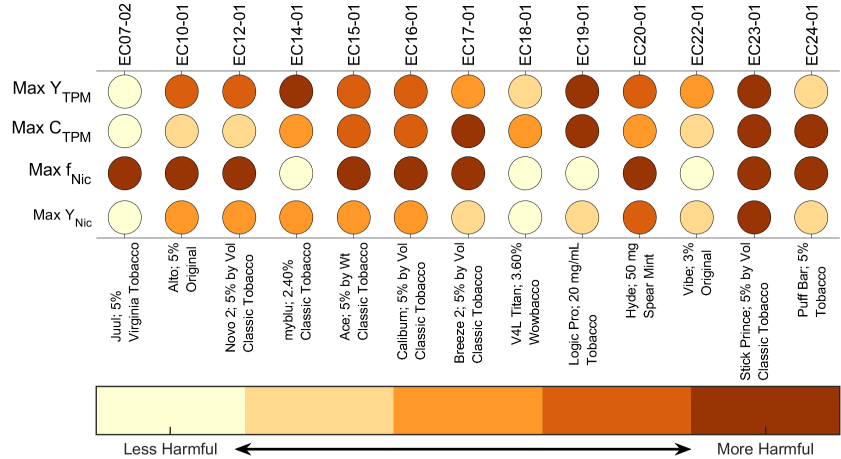

**Research Question:** Are there associations between Product Emissions Characteristics (what is delivered to the mouth of a user) and Product Design Characteristics (the design, composition and operation of the tobacco product)?

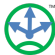

## Effect of Product Design Characteristics on Max $\hat{Y}_{TPM}(Puff)$

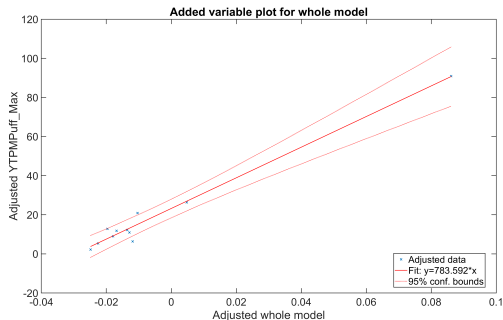

| Estimated Coefficients: | Estimate | SE     | tStat   | pValue   |
|-------------------------|----------|--------|---------|----------|
| (Intercept)             | 23.229   | 28.23  | 0.8228  | 0.457    |
| MaxAF                   | 0.2516   | 0.1078 | 2.335   | 0.0798   |
| MaxAD                   | -1.7727  | 1.355  | -1.3082 | 0.261    |
| $R_{Coil}$              | -2.5472  | 5.000  | -0.5094 | 0.637    |
| Max $P_{Nom}$           | 1.4806   | 0.1667 | 8.882   | 0.000888 |
| $f_{Nic}$ Unpuffed      | -783.4   | 319.4  | -2.453  | 0.0702   |
| PG Fraction             | 17.098   | 15.16  | 1.128   | 0.322    |

Number of observations: 11

Error degrees of freedom: 4

Root Mean Squared Error: 5.62

R-squared: 0.98, Adjusted R-Squared: 0.95

F-statistic vs. constant model: 31.8, p-value = 0.00246

Conclusion: Coil Power is significantly associated ( $p < 0.001$ ) with Max  $\hat{Y}_{TPM}(Puff)$ .

Conclusion: E-Liquid Nicotine Concentration is marginally associated ( $p \approx 0.07$ ) with Max  $\hat{Y}_{TPM}(Puff)$ .

Conclusion: Max AF is marginally associated ( $p \approx 0.08$ ) with Max  $\hat{Y}_{TPM}(Puff)$ .



# Effect of Product Design Characteristics on Max $\hat{C}_{TPM}$

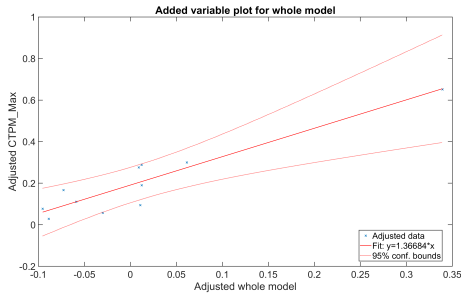

| Estimated Coefficients: | Estimate   | SE        | tStat    | pValue  |
|-------------------------|------------|-----------|----------|---------|
| (Intercept)             | 0.191      | 0.51052   | 0.37413  | 0.7273  |
| MaxAF                   | -0.0014389 | 0.0019487 | -0.73839 | 0.50126 |
| MaxAD                   | -0.01002   | 0.024504  | -0.40893 | 0.70354 |
| $R_{Coil}$              | -0.012922  | 0.090422  | -0.1429  | 0.89328 |
| Max $P_{Nom}$           | 0.0099909  | 0.0030143 | 3.3145   | 0.02953 |
| $f_{Nic}$ Unpuffed      | -1.3392    | 5.7751    | -0.2319  | 0.828   |
| PG Fraction             | 0.27256    | 0.2741    | 0.99439  | 0.37632 |

Number of observations: 11

Error degrees of freedom: 4

Root Mean Squared Error: 0.102

R-squared: 0.868, Adjusted R-Squared: 0.669

F-statistic vs. constant model: 4.37, p-value = 0.0874

Conclusion: Coil Power is significantly associated ( $p < 0.03$ ) with Max  $\hat{C}_{TPM}$ ..

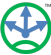

## Effect of Product Design Characteristics on Max $\hat{f}_{Nic}(Puff)$

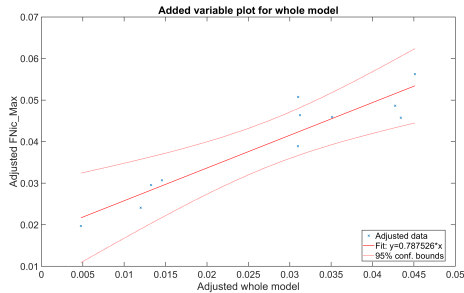

| Estimated Coefficients:  | Estimate    | SE         | tStat    | pValue  |
|--------------------------|-------------|------------|----------|---------|
| (Intercept)              | 0.017905    | 0.032952   | 0.54335  | 0.61575 |
| MaxAF                    | 2.2308e-05  | 0.00012578 | 0.17736  | 0.86784 |
| MaxAD                    | -0.00033789 | 0.0015816  | -0.21363 | 0.84128 |
| $R_{Coil}$               | -0.0047046  | 0.0058364  | -0.80609 | 0.46539 |
| Max $P_{Nom}$            | -0.0002499  | 0.00019456 | -1.2844  | 0.26834 |
| $\hat{f}_{Nic}$ Unpuffed | 0.78746     | 0.37276    | 2.1125   | 0.1022  |
| PG Fraction              | 0.0087818   | 0.017692   | 0.49637  | 0.64567 |

Number of observations: 11

Error degrees of freedom: 4

Root Mean Squared Error: 0.00656

R-squared: 0.879, Adjusted R-Squared: 0.698

F-statistic vs. constant model: 4.85, p-value = 0.0741

Conclusion: E-Liquid Nicotine Concentration is marginally associated ( $p \approx 0.1$ ) with Max  $\hat{f}_{Nic}$ .



## Effect of Product Design Characteristics on Max $\hat{Y}_{Nic}(Puff)$

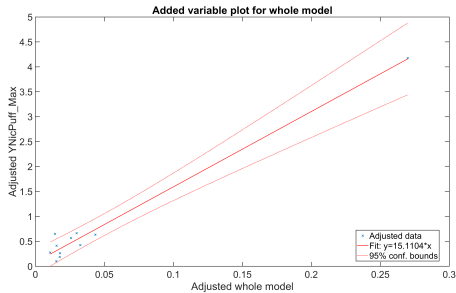

| Estimated Coefficients: | Estimate  | SE        | tStat     | pValue     |
|-------------------------|-----------|-----------|-----------|------------|
| (Intercept)             | 0.082103  | 1.3125    | 0.062552  | 0.95312    |
| MaxAF                   | 0.0090964 | 0.00501   | 1.8157    | 0.1436     |
| MaxAD                   | -0.062473 | 0.063     | -0.99164  | 0.3775     |
| $R_{Coil}$              | -0.02223  | 0.23248   | -0.095622 | 0.92842    |
| Max $P_{Nom}$           | 0.06775   | 0.0077498 | 8.7422    | 0.00094341 |
| $f_{Nic}$ Unpuffed      | -15.094   | 14.848    | -1.0166   | 0.36684    |
| PG Fraction             | 0.69682   | 0.70471   | 0.98881   | 0.37873    |

Number of observations: 11

Error degrees of freedom: 4

Root Mean Squared Error: 0.261

R-squared: 0.979, Adjusted R-Squared: 0.948

F-statistic vs. constant model: 31.6, p-value = 0.00249

Conclusion: Coil Power is significantly associated ( $p < 0.001$ ) with Max  $\hat{Y}_{Nic}(Puff)$ .



# Identifying Influential Product Design Characteristics for ENDS Regulation

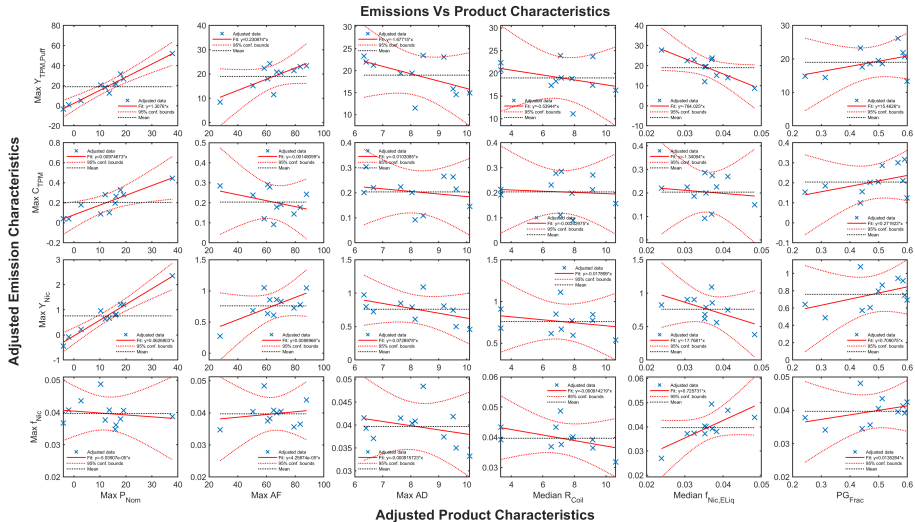



## Regulatory Recommendations:

- The product emission characteristics of  $\text{Max } \hat{Y}_{TPM}$ ,  $\text{Max } \hat{C}_{TPM}$ ,  $\text{Max } \hat{Y}_{Nic}$  and  $\text{Max } \hat{Y}_{HPHC}$  should be regulated.
- The product design characteristic of maximum achievable power dissipated in the coil,  $\text{Max } P_{Coil}$ , should be regulated.



# Product User Behavior Characteristics

## What is needed: An essential gap

| Device Manufacturer | Device Model  | Consumable Manufacturer | Consumable Labeled Flavor | Range $qP_{uff}$ [mL/s] | Range $dP_{uff}$ [s] | Range $vP_{uff}$ [mL] | Range $N_{PD}$ [puff/day] | Range $N_{PS}$ [puff/session] | Range $N_{SD}$ [session/day] | Session Duration [s] | Session Period [s] |
|---------------------|---------------|-------------------------|---------------------------|-------------------------|----------------------|-----------------------|---------------------------|-------------------------------|------------------------------|----------------------|--------------------|
| JUUL LABS           | Juul          | JUUL LABS               | Virginia Tobacco          |                         |                      |                       |                           |                               |                              |                      |                    |
| VUSE                | Alto          | VUSE                    | Original                  |                         |                      |                       |                           |                               |                              |                      |                    |
| SMOK                | Novo 2        | MAD HATTER              | Classic Tobacco           |                         |                      |                       |                           |                               |                              |                      |                    |
| BLU                 | myblu         | BLU                     | Classic Tobacco           |                         |                      |                       |                           |                               |                              |                      |                    |
| NJOY                | Ace           | NJOY                    | Classic Tobacco           |                         |                      |                       |                           |                               |                              |                      |                    |
| UWELL               | Caliburn      | MAD HATTER              | Classic Tobacco           |                         |                      |                       |                           |                               |                              |                      |                    |
| ASPIRE              | Breeze 2      | MAD HATTER              | Classic Tobacco           |                         |                      |                       |                           |                               |                              |                      |                    |
| VAPOR4LIFE          | V4L Titan     | VAPOR4LIFE              | Wowbacco                  |                         |                      |                       |                           |                               |                              |                      |                    |
| LOGIC VAPES         | Logic Pro     | LOGIC VAPES             | Tobacco                   |                         |                      |                       |                           |                               |                              |                      |                    |
| LOONTECH            | Hyde Original | LOONTECH                | Spearmint                 |                         |                      |                       |                           |                               |                              |                      |                    |
| VUSE                | Vibe          | VUSE                    | Original Tobacco          |                         |                      |                       |                           |                               |                              |                      |                    |
| SMOK                | Stick Prince  | MAD HATTER              | Classic Tobacco           |                         |                      |                       |                           |                               |                              |                      |                    |
| PUFF BAR            | Puff Bar      | PUFF BAR                | Tobacco                   |                         |                      |                       |                           |                               |                              |                      |                    |
